# Supplementary figures and images for: Development and Preliminary Evaluation of a Nanoparticle-Assisted PCR Assay for the Detection of Cryptosporidium parvum in Calves
Source: MDPI journal article supplement (doi:10.3390/ani12151953), 2022-08-01

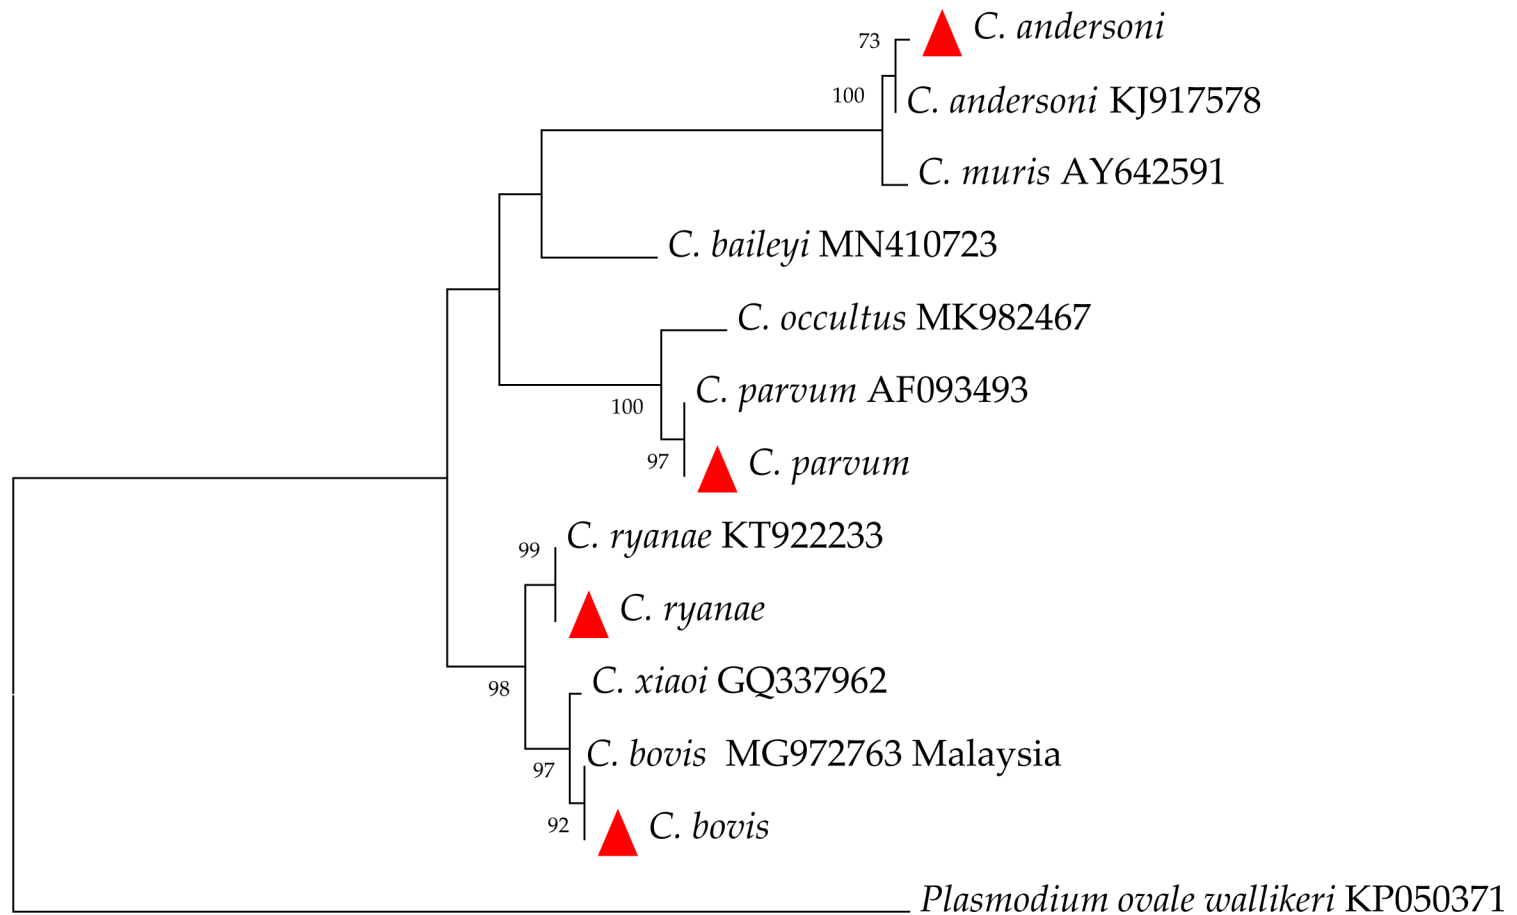

0.02

Supplement: s1 [file s1]
